# Supplementary material for: The Omicron (B.1.1.529) SARS-CoV-2 variant of concern also affects companion animals
Source: Front Vet Sci. 2022 Aug 12;9:940710. doi: 10.3389/fvets.2022.940710 (PMC9411866; doi:10.3389/fvets.2022.940710)
Supplement: Supplementary file 1 [file Table_1.XLSX]

## Sheet: Hoja1
Accession ID	Originating Laboratory	Submitting Laboratory	Authors
EPI_ISL_10265826	CEPHR	Irish Coronavirus Sequencing Consortium - National University of Ireland Galway	Dana Alalwan Alejandro Garcia; Gabriel Gonzalez; Grainne Mc Andrew; Kate Reddington; Patrick Mallon; Riya Negi; Sarah Miles; Simone Coughlan
EPI_ISL_11294889	Microbiology Department, Laboratori Clínic Metropolitana Nord.Hospital Universitari Germans Trias i Pujol	Can Ruti SARS-CoV-2 Sequencing Hub(HUGTiP/IrsiCaixa/IGTP)	Alexia París; Ana Blanco; Andreu Coello; Antoni E Bordoy; Bonaventura Clotet; David Panisello; Francesc Catala-Moll; Gemma Clara; Ignacio Blanco; Laia Soler; Lauro Sumoy; Marc Noguera-Julian; Mercedes Guerrero; Montserrat Giménez; Pere-JoanCardona; Pilar Armengol; Roger Paredes; Sara González; Verónica Saludes; and Elisa Martró on behalf of the Can Ruti SARS-CoV-2 Sequencing Hub
EPI_ISL_10337127	Department of Virology, National Veterinary Research Institute	Department of Omics Analysis, National Veterinary Research Institute	Bomba Arkadiusz; Domanska-Blicharz Katarzyna; Iwan Ewelina; Katarzyna Tluscik; Lisowska Anna; Niemczuk Krzysztof; Opolska Justyna; Orlowska Anna; Rola Jerzy; Smreczak Marcin; Trebas Pawel
EPI_ISL_4565991	Laboratório de Agentes Infecciosos e Vetores -LAIVE- Bahia, Barreiras, Brazil	Laboratório Baculovírus	Aline Belmok; Bergmann M Ribeiro; Fernando L Melo; Jaime Amorim; Josilene Pinheiro
EPI_ISL_4601275	HOSPITAL GENERAL UNIVERSITARIO DE ALBACETE	Instituto de Salud Carlos III	A. Monzón; CARIDAD; F. Casas; I. Jiménez; I.SAINZ DE BARANDA CAMINO; M. Sandonís; P. Zaballos; S. Cuesta; S. Iglesias-Caballero; S. Pozo; S. Varona; V. Camarero; Vázquez-Morón
EPI_ISL_10145967	AORN "San Pio" di Benevento, UOPatologia Clinica, UO MalattieInfettive	Laboratory of MolecularMedicine and Genomics(LMMGe)	Alessandro Weisz (Corresponding Author); Angelo Salomone Megna; Annamaria Salvati; Assunta Sellitto; Carlo Ferravante; Domenico Memoli; Domenico Palumbo; Elena Alexandrova; Francesca Rizzo (Corresponding Author); Giorgio Giurato (Corresponding Author); Giovanni Nassa;Giovanni Pecoraro; Ilaria Terenzi; Jessica Lamberti; Konstantinos Geles; Maurizio Fumi; Oriana Strianese; Roberta Tarallo; Teresa R…
EPI_ISL_10239619	IVIC	Laboratorio de Virologia Molecular	Carmen L Loureiro; CoViMol Group; Domingo J Garzaro; Flor H Pujol; Héctor R Rangel; José Luis Zambrano; Lieska Rodríguez; Mariana Hidalgo; Pierina D ́Angelo; Rossana C Jaspe; Víctor Alarcón; Yoneira Sulbaran; Zoila Moros
EPI_ISL_2628963	Department of Veterinary Public Health, Faculty of Veterinary Science, Chulalongkorn University, Bangkok, Thailand, Center ofExcellence for Emerging and Re-emerging Infectious Diseases in Animals, and One Health Research Cluster, Faculty ofVeterinary Science, Chulalongkorn University	Department of Veterinary Public Health, Faculty of Veterinary Science, Chulalongkorn University, Bangkok, Thailand, Center ofExcellence for Emerging and Re-emerging Infectious Diseases in Animals, and One Health Research Cluster, Faculty ofVeterinary Science, Chulalongkorn University	Boonyapisitsopa, S.; Bunpapong, N.; Chaiyawong, S.; Chamsai, E.; Charoenkul, K.; Jairak, W.;Poovorawan; Surachetpong, S.; Suwannakarn, K.; Tangwangvivat, R.; Tantilertcharoen, R.;Techakriengkrai, N.; Udom, K.; Y. and Amonsin, A.
EPI_ISL_10113814	Macha Mission Hospital	Macha Research Trust	Ben Katowa; Benjamin Mubambe; Edgar Simulundu; Japhet Matoba; Walter Muleya
EPI_ISL_9373786	REUNILAB	UMR PIMIT	Dr Camille Lebarbenchon; Dr David A Wilkinson; Dr Jonathan Turpin; Dr Patrick Mavingui; Magali Turpin; Marie-Alice Simbi
EPI_ISL_5967235	HOSPITAL GENERAL UNIVERSITARIO DE GUADALAJARA	Instituto de Salud Carlos III	A. Monzón; ALEJANDRO; F. Casas; I. Jiménez; I.GONZALEZ PRAETORIUS; Iglesias-Caballero; M. Sandonís; P. Zaballos; S. Camarero; S. Cuesta; S. Pozo; S. Varona; V. Vázquez-Morón
EPI_ISL_6718108	Hospital Universitari Dr. Josep Trueta	Institut d'Investigació Biomèdica de Girona | Hospital Universitari Dr. Josep Trueta	Bernat del Olmo; Mel·lina Pinsach; Meritxell Deulofeu; Nuria Esther Neto; Paula Costa
EPI_ISL_10252527	Microbiology Department. Complexo Hospitalario Universitario de Vigo	Microbiology Department. Complexo Hospitalario Universitario de Vigo	Alvarez M; Cabrera JJ; Carballo R; Cortizo S; Davina C; Martinez L; Mediero G; Pena I; Perez S; Potel C; Regueiro B; Rey S; Vasallo FJ; del-Campo V
EPI_ISL_5104522	Department of Veterinary Science, National Institute of Infectious Diseases	Department of Veterinary Science, National Institute of Infectious Diseases	Keita Ishijima; Ken Maeda; Tsukasa Yamamoto; Yudai Kuroda
EPI_ISL_7974436	California Animal Health and Food Safety Laboratory - University of California-Davis	Diagnostic Virology Laboratory, National Veterinary Services Laboratories, USDA1920 Dayton Avenue, Ames, IA 50010, USA	Emily R. Love; Kerrie M. Franzen; Mary L. Killian; Mia Torchetti; Suelee Robbe-Austerman; Tod P. Stuber
EPI_ISL_4296308	Centers for Disease Control & Prevention	Genomics and Discovery, Respiratory Viruses Branch, Division of ViralDiseases, Centers for Disease Control and Prevention	Adam Retchless; Anna Kelleher; Anna Uehara; Ausaf Ahmad; Brian Lynch; Claire Godino; Clinton R. Paden; Dhwani Batra; Haibin Wang; Han Jia Justin Ng; Jasmine Padilla; Jing Zhang; Justin Lee; Mark Burroughs; Mili Sheth;Morgan Davis; Owen Herzegh; Paige Bunkley; Peter Cook; Rachel Marine; Sarah Nobles; Suxiang Tong; Tara Coalter; Yan Li; Ying Tao
EPI_ISL_10126704	VISAVET	VISAVET	José M. Sánchez-Vizcaíno; Lidia Sánchez-Morales; Sandra Barroso-Arévalo
EPI_ISL_10290113	Labor Dr. Wisplinghoff - Köln	Robert Koch Institute
EPI_ISL_8542937	Indian Council of Medical Research-National Institute of Virology, Microbial Containment Complex	Indian Council of Medical Research-National Institute of Virology, Microbial Containment Complex	Pragya D. Yadav
EPI_ISL_9261692	Servicio Virosis Respiratorias-Departamento Virología-INEI	Instituto Nacional Enfermedades Infecciosas C.G.Malbran	Avaro M.; Baumeister E.; Benedetti E.; Campos J.; Cisterna D.; Dattero ME; De Belder D.; Haim MS.; Lorenzo F.; Molina V.; Perandones C.; Poklepovich T.; Pontoriero A.; Russo M.; Sanchez Loria J.; Tuduri E.
EPI_ISL_402124	Wuhan Jinyintan Hospital	Wuhan Institute of Virology, Chinese Academy of Sciences	Ding-Yu Zhang; Hao-Rui Si; Lei Zhang; Peng Zhou; Xing-Lou Yang; Yan Zhu; Zhengli Shi
EPI_ISL_9414680	White Buffalo, Inc	PSU Animal DiagnosticLaboratory	Meera Surendran Nair; Suresh Kuchipudi; Vivek Kapur
EPI_ISL_9012363	Hospital General Universitario Albacete	Hospital General Universitario Albacete	Caridad Sainz de Baranda Camino; Lorena Robles-Fonseca
EPI_ISL_8331585	ACT Pathology	Schwessinger Lab	Ashley Jones; Austin Bird; Bayantes Dagvadorj; Benjamin Schwessinger; Carl McCombe; Catalina Barragán Quintero; Craig Kennedy; Elise Kellett; Evie Hodgson; Gabrielle Smith; Karina Kennedy; Rachel Leonard; Rene Riedelbauch; RobynHall; Salome Wilson; Scott Ferguson
EPI_ISL_8170076	HOSPITAL UNIVERSITARIO 12 DE OCTUBRE	HOSPITAL UNIVERSITARIO 12 DE OCTUBRE	Carmen Martín-Higuera; Esther Viedma; Irene Múñoz-Gallego; M.ª Dolores Folgueira; Mar Aguilera; Noelia Moral; Rafael Delgado; Sagrario Zurita
EPI_ISL_11260529	Hospital Universitario Marqués de Valdecilla	Servicio de Microbiologia. Hospital Universitario Marqués de Valdecilla	Elena Bolado Conde; Javier Freire Salinas; Jesús Agüero Balbín; Jesús Rodríguez Lozano; Jorge Calvo Montes; Mónica Gozalo Margüello; Sergio Garcia Fernandez
EPI_ISL_11247909	Microbiology Department. Complexo Hospitalario Universitario de Vigo	Microbiology Department. Complexo Hospitalario Universitario de Vigo	Alvarez M; Cabrera JJ; Carballo R; Cortizo S; Davina C; Martinez L; Mediero G; Pena I; Perez S; Potel C; Regueiro B; Rey S; Vasallo FJ; del-Campo V
EPI_ISL_9773743	School of Public Health, HKU	The University of Hong Kong School of Public Health	HaoGao Gu; Leo LM Poon; Malik Peiris; Samuel MS Cheng
EPI_ISL_6595289	Hospital Universitari Vall d'Hebron-Vall d'Hebron Institut de Recerca	Hospital Universitari Vall d'Hebron-Vall d'Hebron Institut de Recerca	Alejandra González-Sánchez; Andrés Antón; Ariadna Rando; Carla Castillo; Cristina Andrés; Damir Garcia-Cehic; Josep Quer; Juliana Esperalba; Karen García; Maria Carmen Martin; Maria Gema Codina; Maria Piñana; Rosrigo Vásquez; Tomàs Pumarola
EPI_ ISL_4303810	Microbiology Department, Laboratori Clínic Metropolitana Nord.Hospital Universitari Germans Trias i Pujol	Can Ruti SARS-CoV-2 Sequencing Hub(HUGTiP/IrsiCaixa/IGTP)	Alexia París; Anna Not; Antoni E Bordoy; Bonaventura Clotet; Cristina Casañ; David Panisello; Francesc Catala-Moll; Gemma Clara; Ignacio Blanco; Laia Soler: Lauro Sumoy; Marc Noguera-Julian; Maria Casadellà; Mariona Parera; Mercedes Guerrero; Montserrat Giménez; Pere-Joan Cardona; Pilar Armengol; Roger Paredes; Verónica Saludes; and Elisa Martró on behalf of the Can Ruti SARS-CoV-2 Sequencing Hub
EPI_ISL_6595294	Hospital Universitari Vall d'Hebron-Vall d'Hebron Institut de Recerca	Hospital Universitari Vall d'Hebron-Vall d'Hebron Institut de Recerca	Alejandra González-Sánchez; Andrés Antón; Ariadna Rando; Carla Castillo; Cristina Andrés; Damir Garcia-Cehic; Josep Quer; Juliana Esperalba; Karen García; Maria Carmen Martin; Maria Gema Codina; Maria Piñana; Rosrigo Vásquez; Tomàs Pumarola
